# Supplementary material for: TGF-β regulates phosphorylation and stabilization of Sox9 protein in chondrocytes through p38 and Smad dependent mechanisms
Source: PubMed Central journal article supplement (PMC5144132; doi:10.1038/srep38616), 2016-12-08
Supplement: srep38616-s1.pdf [file srep38616-s1.pdf]

**Supplementary information for:**

**TGF- $\beta$  regulates phosphorylation and stabilization of Sox9 protein in chondrocytes through p38 and Smad dependent mechanisms.**

**George Coricor and Rosa Serra\***

University of Alabama at Birmingham, Department of Cell, Developmental, and Integrative Biology, Birmingham, Alabama, 35294-0005, USA.

\* [rserra@uab.edu](mailto:rserra@uab.edu)

**Supplementary Table S1- Conserved Sox9 Serine 211 p38 phosphorylation motif**

| <b>Species</b> | <b>Sequence</b>          |
|----------------|--------------------------|
|                | 211                      |
| Human          | FKALQAD <u>S</u> PHSSSGM |
| Chimpanzee     | FKALQAD <u>S</u> PHSSSGM |
| Mouse          | FKALQAD <u>S</u> PHSSSGM |
| Bovine         | FKALQAD <u>S</u> PHSSSGM |
| Platypus       | FKALQAD <u>S</u> PHSSSGM |
| Chicken        | FKALQAD <u>S</u> PHSSSGM |
| Frog           | FKALQAD <u>S</u> PHSSSGI |

## Supplementary Table S2. Primer Sequences for qPCR

| Gene                                       | Forward Primer                | Reverse Primer          |
|--------------------------------------------|-------------------------------|-------------------------|
| <i>Mouse Sox9</i><br>CCA GA                | AGG AAG TCG GTG AAG AAC GG    | GGA CCC TGA GAT TGC     |
| <i>Mouse Papss2</i><br>TCC                 | CCC GTG ATG GAG TCA ACA TGA G | GTG CTT TGC AGT GGG TGT |
| <i>Mouse PPIA</i> <sup>56</sup><br>GCA CAT | CGC GTC TCC TTC GAG CTG TTT G | TGT AAA GTC ACC CTG     |

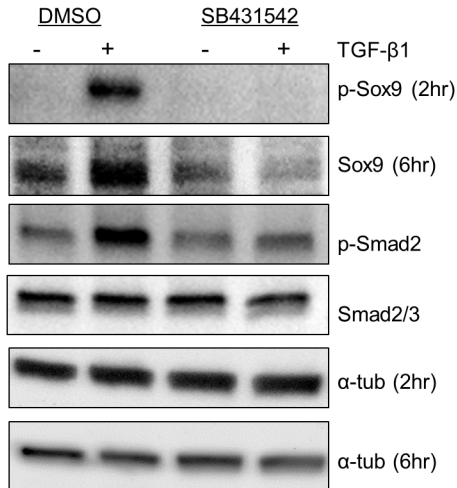

**Supplementary Figure S1: SB431542 blocks TGF- $\beta$ 1 mediated upregulation of p-Sox9 and Sox9 proteins.** ATDC5 cells were pre-treated with SB431542 or DMSO control for 2 hours, then treated with TGF- $\beta$ 1 or vehicle control for 2 or 6 hours. Cell lysates were collected and used for immunoblotting for p-Sox9, Sox9, p-Smad2, and Smad2/3. To ensure equal loading,  $\alpha$ -tubulin was used as loading control.



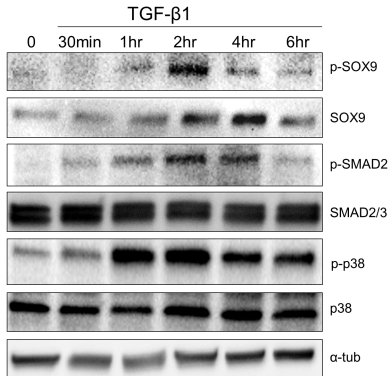

**Supplementary Figure S2: SOX9 phosphorylation and protein levels are up-regulated by TGF- $\beta$ 1 in bovine articular chondrocytes.** A) Bovine articular chondrocytes were treated with TGF- $\beta$ 1 for varying times as indicated at which point protein lysates were collected. SOX9, p-SOX9, SMAD2/3, p-SMAD2, p38, and p-p38 protein levels were determined by immunoblot.  $\alpha$ -tubulin was used as a loading control. N=3.

**A**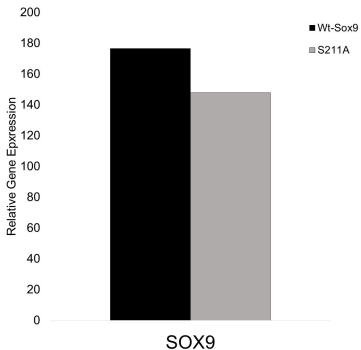**B**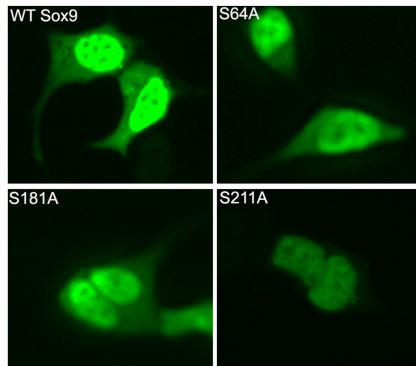

**Supplementary Figure S3: Sox9 S211A mutant mRNA is transcribed and protein can localize to the nucleus.** A) QPCR was used to show that the Sox9 S211A mutant was transcribed at similar levels to the WT-Sox9. B) HEK 293 cells were transfected with HA-tagged WT Sox9 or HA-tagged mutants (S64A, S181A, and S211A). Immunofluorescence staining was performed using anti-HA antibody and Alexa-Fluor 488 conjugated secondary antibody (green). Representative fluorescence images show Wt-Sox9 and Sox9 mutants are able to translocate to the nucleus. No signal was observed in samples incubated with secondary antibody alone (not shown).

## Supplementary Figure 4-1 to 10: Examples of uncropped western blots.

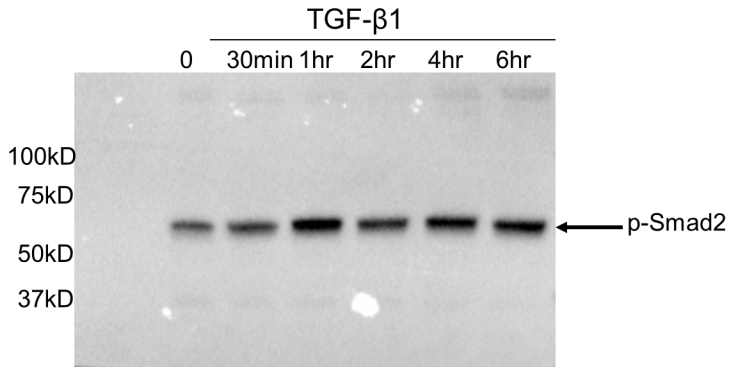

Example of p-Smad2 uncropped western blot, from Figure 1D

# TGF- $\beta$ 1

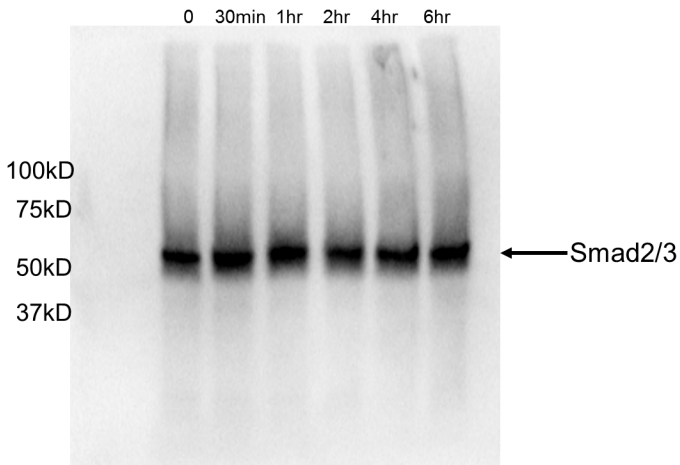

Example of Smad2/3 uncropped western blot, from Figure 1D

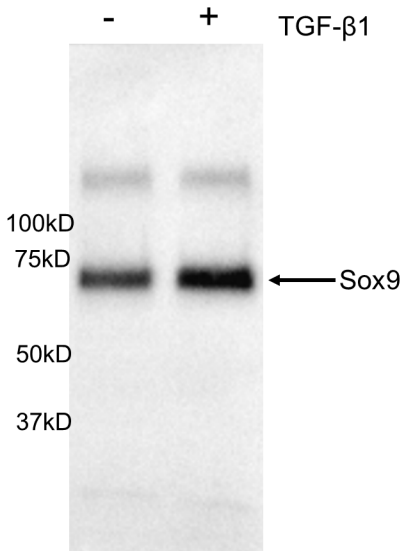

Example of Sox9 uncropped western blot, from Figure 1B

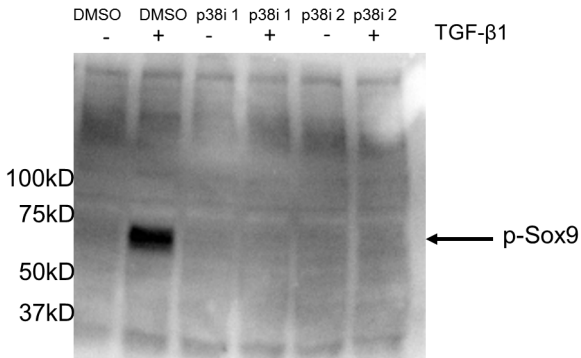

Example of p-Sox9 uncropped western blot, from Figure 3C

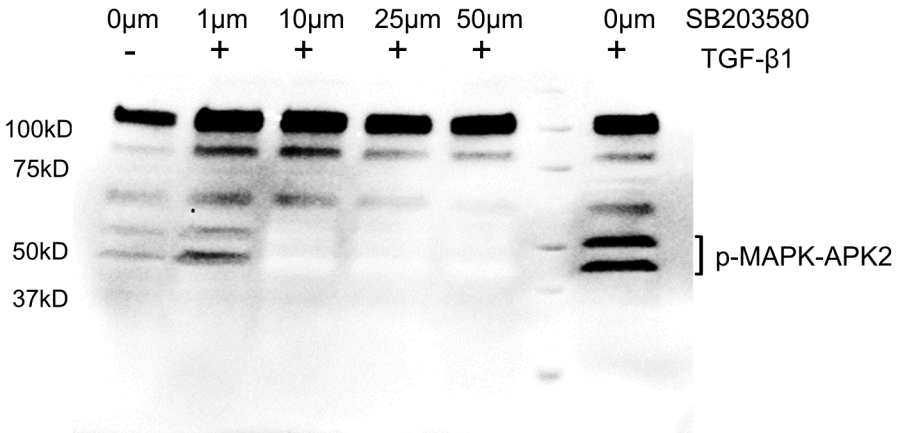

Example of p-MAPK-APK2 uncropped western blot, from Figure 3A

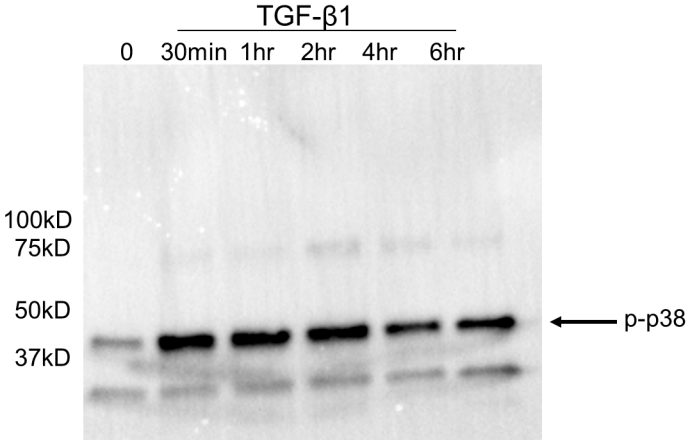

Example of p-p38 uncropped western blot, from Figure 1D



TGF- $\beta$ 1

0 30min 1hr 2hr 4hr 6hr

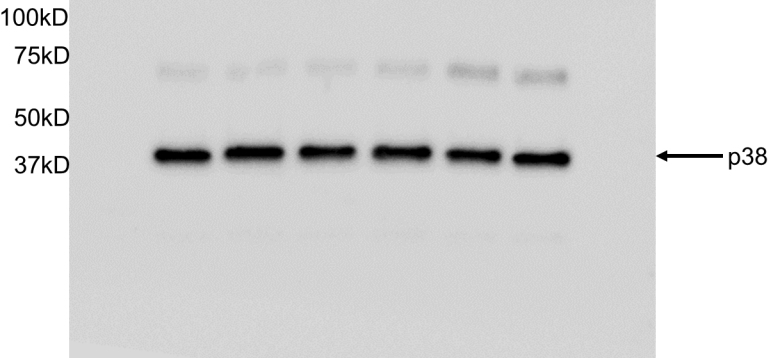

Example of p38 uncropped western blot, from Figure 1D

Wt-Sox9 Wt-Sox9 S211A S211A  
DMSO MG132 DMSO MG132

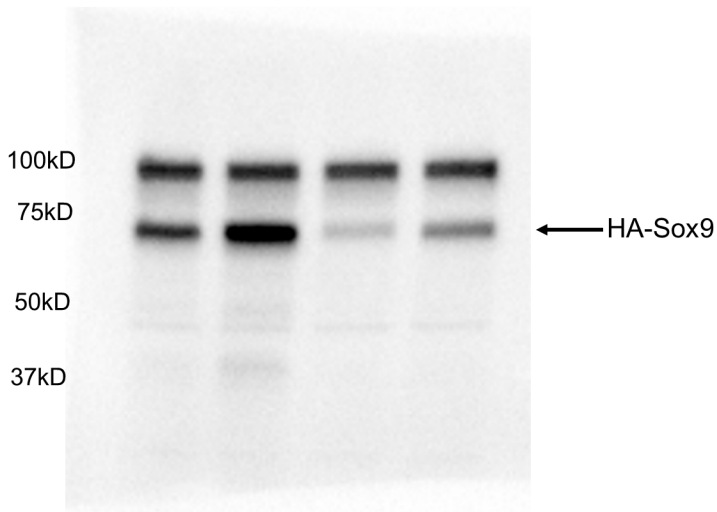

Example of HA-Sox9 uncropped western blot, from Figure 2C

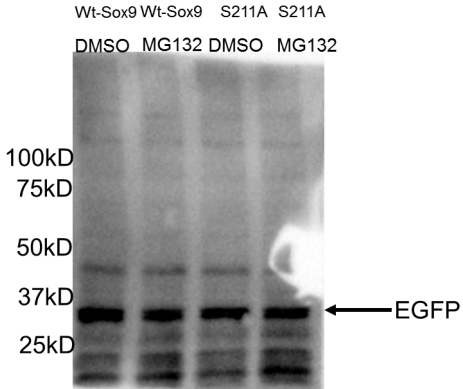

Example of EGFP uncropped western blot, from Figure 2C

TGF- $\beta$ 1

0 30min 1hr 2hr 4hr 6hr

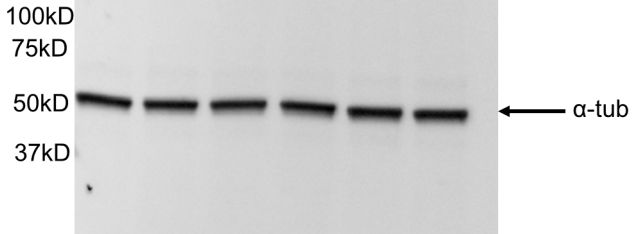

Example of  $\alpha$ -tub uncropped western blot, from Figure 1D
